# Supplementary material for: Modifiable Risk Factor Score and Fecundability in a Preconception Cohort in Singapore
Source: PubMed Central journal article supplement (PMC10408273; doi:10.1001/jamanetworkopen.2022.55001), 2023-02-07
Supplement: jamanetwopen-e2255001-s001.pdf [file jamanetwopen-e2255001-s001.pdf]

## Supplemental Online Content

Loy SL, Ku CW, Tiong MMY, et al. Modifiable risk factor score and fecundability in a preconception cohort in Singapore. *JAMA Netw Open*. 2023;6(2):e2255001. doi:10.1001/jamanetworkopen.2022.55001

**eTable 1.** Characteristics of Participants According to Their Inclusion Status in the Present Study

**eTable 2.** Association Between Risk Score and Fecundability, Based on Singleton Live Birth as Outcome Measure

**eTable 3.** Association Between Risk Score and Fecundability, Using Healthful Plant-Based Diet Index at Score of  $\leq 47$  to Indicate Unhealthy Diet in the Risk Score

**eTable 4.** Association Between Weighted Risk Score and Fecundability

**eTable 5.** Association Between Risk Score and Fecundability Among Women With Conception Attempts of  $\leq 3$ ,  $\leq 6$  and  $\leq 12$  Months at Study Entry

**eTable 6.** Association Between Risk Score and Fecundability When Excluding Women With Polycystic Ovarian Syndrome (PCOS) Reported or When Excluding Maternal Age Factor From the Risk Score

This supplementary material has been provided by the authors to give readers additional information about their work.

**eTable 1. Characteristics of participants according to their inclusion status in the present study**

| Characteristics                                  | No. (%)          |                              | p <sup>b</sup> |
|--------------------------------------------------|------------------|------------------------------|----------------|
|                                                  | Included (n=937) | Excluded (n=95) <sup>a</sup> |                |
| Age at recruitment ≥32 years                     | 380 (40.6)       | 35 (36.8)                    | 0.482          |
| Ethnicity                                        |                  |                              | 0.725          |
| Chinese                                          | 672 (71.7)       | 71 (74.7)                    |                |
| Indian                                           | 85 (9.1)         | 10 (10.5)                    |                |
| Malay                                            | 148 (15.8)       | 11 (11.6)                    |                |
| Mixed ethnicity <sup>c</sup>                     | 32 (3.4)         | 3 (3.2)                      |                |
| Educational level: <tertiary level               | 348 (37.1)       | 36 (43.9)                    | 0.226          |
| Monthly household income (SGD)                   |                  |                              | 0.762          |
| Low: 1 <sup>st</sup> - 3 <sup>rd</sup> decile    | 116 (12.4)       | 14 (14.7)                    |                |
| Middle: 4 <sup>th</sup> - 7 <sup>th</sup> decile | 625 (66.7)       | 63 (66.3)                    |                |
| High: 8 <sup>th</sup> - 10 <sup>th</sup> decile  | 196 (20.9)       | 18 (18.9)                    |                |
| Parity ≥1                                        | 323 (34.5)       | 31 (41.9)                    | 0.200          |
| Smoking status: ever smoker                      | 96 (10.2)        | 11 (14.9)                    | 0.214          |
| Alcohol intake >1 drink per wk                   | 99 (10.6)        | 12 (12.6)                    | 0.536          |
| BMI: <18.5 or ≥23                                | 505 (53.9)       | 39 (55.7)                    | 0.768          |
| Vegetable intake: <2 servings per d              | 666 (71.1)       | 48 (68.6)                    | 0.656          |
| Folic acid supplement nonuser                    | 456 (48.7)       | 34 (45.9)                    | 0.652          |
| Risk score level                                 |                  |                              | 0.115          |
| Level 1: score of 0 or 1                         | 209 (22.3)       | 18 (27.3)                    |                |
| Level 2: score of 2                              | 318 (33.9)       | 16 (24.2)                    |                |
| Level 3: score of 3                              | 277 (29.6)       | 17 (25.8)                    |                |
| Level 4: score of 4                              | 110 (11.7)       | 14 (21.2)                    |                |
| Level 5: score of 5 or 6                         | 23 (2.5)         | 1 (1.5)                      |                |
| Attempted time to conception at study entry, mo  |                  |                              |                |
| >3                                               | 389 (41.5)       | 31 (32.6)                    | 0.093          |
| >6                                               | 258 (27.5)       | 24 (25.3)                    | 0.636          |
| >12                                              | 136 (14.5)       | 12 (12.6)                    | 0.618          |

Abbreviations: BMI, body mass index (calculated as weight in kilograms divided by height in meters squared); SGD, Singapore dollar

SI conversion factor: To convert SGD to US dollars, multiply by 0.74.

<sup>a</sup>Sample size of excluded women does not always equal to 95 due to missing values.

<sup>b</sup>Based on Pearson's chi-squared test.

<sup>c</sup>Mixed ethnicity may include Chinese, Indian, or Malay ethnicity.

**eTable 2. Association between risk score and fecundability, based on singleton live birth as outcome measure<sup>a</sup>**

| <b>Risk score</b>        | <b>Live births<br/>n</b> | <b>Crude model<br/>FR (95% CI)</b> | <b>Adjusted model<sup>b</sup><br/>FR (95% CI)</b> |
|--------------------------|--------------------------|------------------------------------|---------------------------------------------------|
| Level 1: score of 0 or 1 | 104                      | 1.00 [Reference]                   | 1.00 [Reference]                                  |
| Level 2: score of 2      | 124                      | 0.70 (0.54, 0.91)                  | 0.72 (0.55, 0.93)                                 |
| Level 3: score of 3      | 88                       | 0.55 (0.42, 0.73)                  | 0.59 (0.44, 0.78)                                 |
| Level 4: score of 4      | 24                       | 0.36 (0.23, 0.57)                  | 0.39 (0.24, 0.61)                                 |
| Level 5: score of 5 or 6 | 2                        | 0.16 (0.04, 0.66)                  | 0.18 (0.04, 0.73)                                 |
| Per additional level     | 342                      | 0.65 (0.58, 0.72)                  | 0.74 (0.65, 0.83)                                 |

Abbreviations: FR, fecundability ratio; CI, confidence interval.

<sup>a</sup>Data were analyzed using discrete-time proportional hazards models.

<sup>b</sup>Adjusted for ethnicity, educational level, monthly household income, and parity.

**eTable 3. Association between risk score and fecundability, using healthful plant-based diet index at score of  $\leq 47$  to indicate unhealthy diet in the risk score<sup>a</sup>**

|                          | <b>Crude model</b> | <b>Adjusted model<sup>b</sup></b> |
|--------------------------|--------------------|-----------------------------------|
| <b>Risk score</b>        | <b>FR (95% CI)</b> | <b>FR (95% CI)</b>                |
| Level 1: score of 0 or 1 | 1.00 [Reference]   | 1.00 [Reference]                  |
| Level 2: score of 2      | 0.60 (0.48, 0.77)  | 0.61 (0.48, 0.78)                 |
| Level 3: score of 3      | 0.64 (0.50, 0.83)  | 0.69 (0.53, 0.90)                 |
| Level 4: score of 4      | 0.40 (0.27, 0.60)  | 0.42 (0.28, 0.63)                 |
| Level 5: score of 5 or 6 | 0.13 (0.02, 0.90)  | 0.13 (0.02, 0.95)                 |
| Per additional level     | 0.76 (0.68, 0.85)  | 0.77 (0.69, 0.85)                 |

Abbreviations: FR, fecundability ratio; CI, confidence interval.

<sup>a</sup>Data were analyzed using discrete-time proportional hazards models.

<sup>b</sup>Adjusted for ethnicity, educational level, monthly household income, and parity.

**eTable 4. Association between weighted risk score and fecundability<sup>a</sup>**

| Weighted risk score <sup>c</sup> | Crude model       | Adjusted model <sup>b</sup> |
|----------------------------------|-------------------|-----------------------------|
|                                  | FR (95% CI)       | FR (95% CI)                 |
| Level 1: score of 0 or 1         | 1.00 [Reference]  | 1.00 [Reference]            |
| Level 2: score of 2 or 3         | 0.59 (0.41, 0.84) | 0.59 (0.42, 0.83)           |
| Level 3: score of 4 or 5         | 0.47 (0.33, 0.66) | 0.49 (0.35, 0.69)           |
| Level 4: score of 6 or 7         | 0.37 (0.25, 0.56) | 0.38 (0.25, 0.56)           |
| Level 5: score of 8 or 10        | 0.22 (0.13, 0.39) | 0.22 (0.13, 0.39)           |
| Per additional level             | 0.73 (0.70, 0.78) | 0.85 (0.81, 0.90)           |

Abbreviations: FR, fecundability ratio; CI, confidence interval.

<sup>a</sup>Data were analyzed using discrete-time proportional hazards models.

<sup>b</sup>Adjusted for ethnicity, educational level, monthly household income, and parity.

<sup>c</sup>The weighted risk score values were estimated based on the range of FRs for each risk factor in the multivariable discrete-time proportional hazards model in relation to fecundability. Score 1: >FR 0.8; Score 2: FR 0.7-0.8; Score 3: FR <0.7.

**eTable 5. Association between risk score and fecundability among women with conception attempts of  $\leq 3$ ,  $\leq 6$  and  $\leq 12$  months at study entry<sup>a</sup>**

|                          | <b><math>\leq 3</math> months<br/>conception attempts<br/>before study entry<br/>(n=548)</b> | <b><math>\leq 6</math> months<br/>conception<br/>attempts before<br/>study entry (n=679)</b> | <b><math>\leq 12</math> months<br/>conception attempts<br/>before study entry<br/>(n=801)</b> |
|--------------------------|----------------------------------------------------------------------------------------------|----------------------------------------------------------------------------------------------|-----------------------------------------------------------------------------------------------|
| <b>Risk score</b>        | <b>FR (95% CI)</b>                                                                           | <b>FR (95% CI)</b>                                                                           | <b>FR (95% CI)</b>                                                                            |
| Level 1: score of 0 or 1 | 1.00 [Reference]                                                                             | 1.00 [Reference]                                                                             | 1.00 [Reference]                                                                              |
| Level 2: score of 2      | 0.57 (0.34, 0.96)                                                                            | 0.71 (0.54, 0.93)                                                                            | 0.75 (0.58, 0.96)                                                                             |
| Level 3: score of 3      | 0.33 (0.18, 0.61)                                                                            | 0.58 (0.43, 0.77)                                                                            | 0.63 (0.48, 0.84)                                                                             |
| Level 4: score of 4      | 0.29 (0.13, 0.65)                                                                            | 0.49 (0.32, 0.75)                                                                            | 0.51 (0.34, 0.76)                                                                             |
| Level 5: score of 5 or 6 | 0.35 (0.06, 1.86)                                                                            | 0.36 (0.11, 1.13)                                                                            | 0.27 (0.08, 0.84)                                                                             |
| Per additional level     | 0.65 (0.52, 0.82)                                                                            | 0.78 (0.69, 0.87)                                                                            | 0.79 (0.71, 0.88)                                                                             |

Abbreviations: FR, fecundability ratio; CI, confidence interval.

<sup>a</sup>Data were analyzed using discrete-time proportional hazards models, adjusting for ethnicity, educational level, monthly household income, and parity.

**eTable 6. Association between risk score and fecundability when excluding women with polycystic ovarian syndrome (PCOS) reported or when excluding maternal age from the risk score<sup>a</sup>**

|                          | <b>Excluding PCOS cases</b>    |                          | <b>Excluding maternal age factor</b> |
|--------------------------|--------------------------------|--------------------------|--------------------------------------|
| <b>Risk score</b>        | <b>FR (95% CI)<sup>b</sup></b> | <b>Risk score</b>        | <b>FR (95% CI)<sup>c</sup></b>       |
| Level 1: score of 0 or 1 | 1.00 [Reference]               | Level 1: score of 0 or 1 | 1.00 [Reference]                     |
| Level 2: score of 2      | 0.67 (0.54, 0.85)              | Level 2: score of 2      | 0.73 (0.57, 0.93)                    |
| Level 3: score of 3      | 0.58 (0.45, 0.75)              | Level 3: score of 3      | 0.67 (0.50, 0.89)                    |
| Level 4: score of 4      | 0.49 (0.34, 0.71)              | Level 4: score of 4 or 5 | 0.51 (0.34, 0.76)                    |
| Level 5: score of 5 or 6 | 0.23 (0.07, 0.70)              |                          |                                      |
| Per additional level     | 0.77 (0.69, 0.86)              | Per additional level     | 0.81 (0.72, 0.91)                    |

Abbreviations: FR, fecundability ratio; CI, confidence interval.

<sup>a</sup>Data were analyzed using discrete-time proportional hazards models.

<sup>b</sup>Adjusted for ethnicity, educational level, monthly household income, and parity.

<sup>c</sup>Adjusted for ethnicity, educational level, monthly household income, parity, and maternal age.
