# Supplementary material for: Modifiable Risk Factor Score and Fecundability in a Preconception Cohort in Singapore
Source: PubMed Central journal article supplement (PMC10408273; doi:10.1001/jamanetworkopen.2022.55001), 2023-02-07
Supplement: jamanetwopen-e2255001-s002.pdf [file jamanetwopen-e2255001-s002.pdf]

## Data Sharing Statement

Loy. Modifiable Risk Factor Score and Fecundability in a Preconception Cohort in Singapore. *JAMA Netw Open*. Published February 07, 2023. doi:10.1001/jamanetworkopen.2022.55001

### Data

**Data available:** No

### Additional Information

**Explanation for why data not available:** Restrictions apply to the availability of these data, which were used under license for this study. Data are available upon request and approval by the S-PRESTO committee.
